# Supplementary material for: Post-infection symptoms following two large waterborne outbreaks of Cryptosporidium hominis in Northern Sweden, 2010–2011
Source: Springer Nature journal article supplement (doi:10.1186/s12889-015-1871-6), 2015-06-04

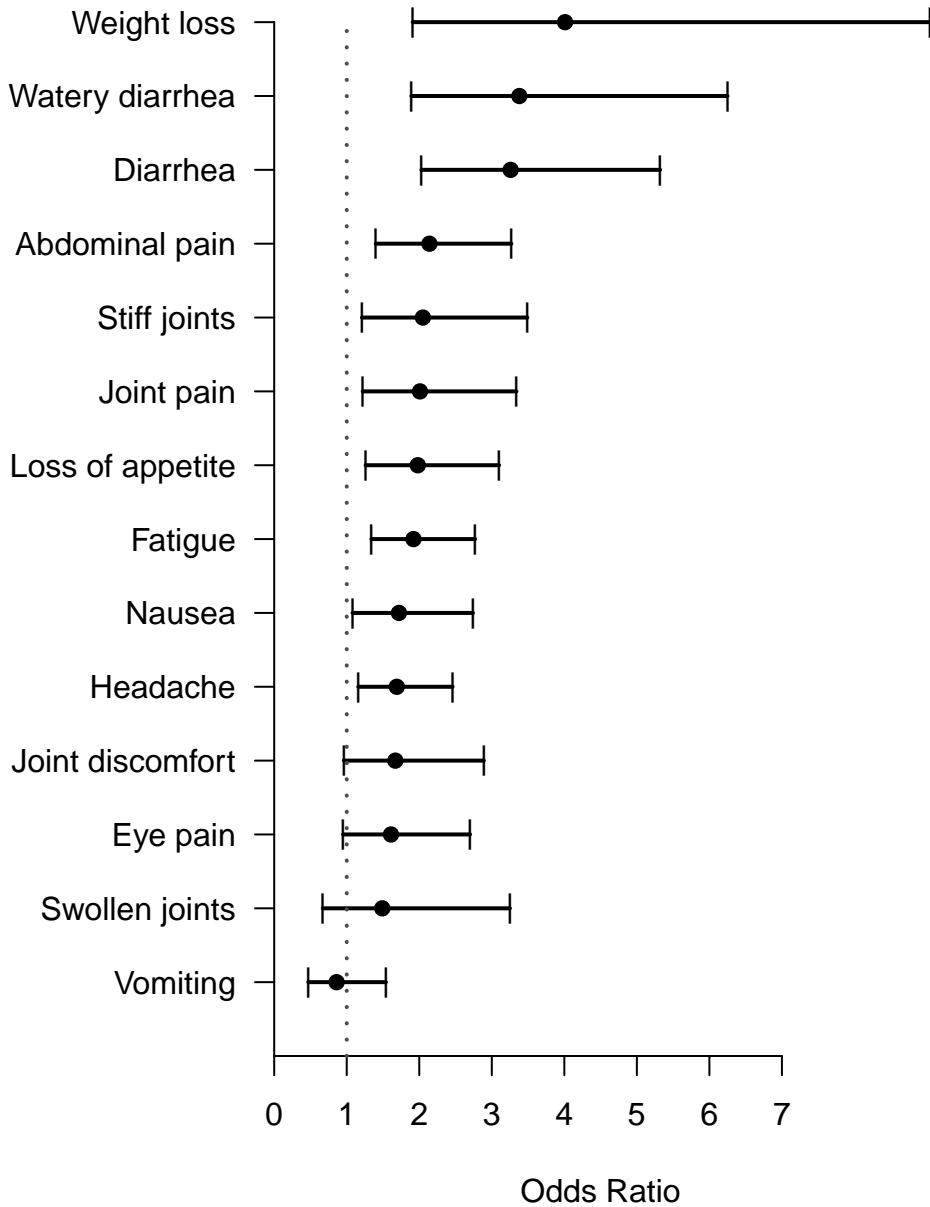

Supplement: MOESM2 [file 9749564]
